# Supplementary material for: Activation-induced Markers Detect Vaccine-Specific CD4+ T Cell Responses Not Measured by Assays Conventionally Used in Clinical Trials
Source: MDPI journal article supplement (doi:10.3390/vaccines6030050), 2018-07-31
Supplement: s1 [file s1]

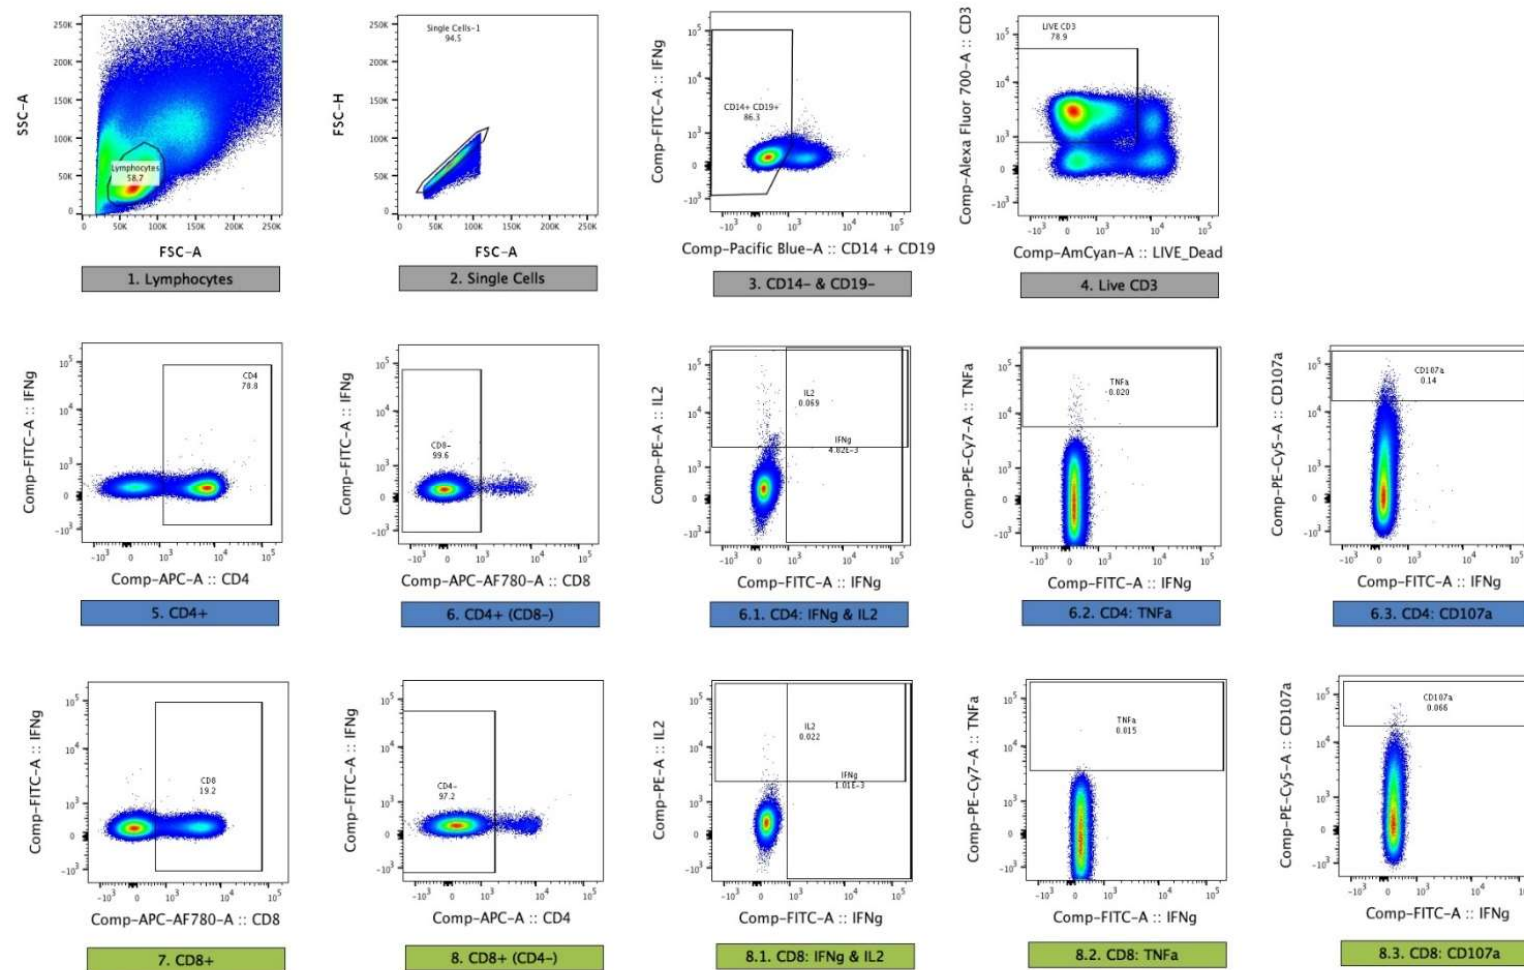

**Supplementary Figure S1.** Intracellular cytokine staining gating strategy. Cells were gated on single lymphocytes based on size. Dead cells, CD14<sup>+</sup> and CD19<sup>+</sup> cells were excluded and T cells were identified by CD3 expression. T cell subsets were gated as CD4<sup>+</sup> and CD8<sup>+</sup> populations. Cytokine expression was quantified by plotting pairs of cytokines against each other and gating positive populations.
